# Supplementary material for: Identification of Physiological Substrates and Binding Partners of the Plant Mitochondrial Protease FTSH4 by the Trapping Approach
Source: Int J Mol Sci. 2017 Nov 18;18(11):2455. doi: 10.3390/ijms18112455 (PMC5713422; doi:10.3390/ijms18112455)
Supplement: Supplementary file 1 [file ijms-18-02455-s001.xlsx]

## Sheet: Arkusz1
sample name	protein name	AGI	Mascot score	MW (Da)	Numer of matches	Number of significant matches	Number of sequences	Number of significant sequences	Sequence coverege %	emPAI
ftsh4-1 FTSH4TRAP.FLAG	Nicotinamide adenine dinucleotide transporter 2	AT1G25380.1	443	39700	12	12	10	10	33	1.61
ftsh4-1			101		2	2	2	2	6	0.17
ftsh4-1 FTSH4TRAP.FLAG			192		10	10	10	10	36	1.22
ftsh4-1			84		2	2	2	2	5	0.17
ftsh4-1 FTSH4TRAP.FLAG	Mitochondrial pyruvate carrier 4	AT4G22310.1	631	12054	21	21	7	7	75	24.73
ftsh4-1			194		7	7	5	5	58	4.75
ftsh4-1 FTSH4TRAP.FLAG			259		11	11	4	4	45	3.48
ftsh4-1			none		none	none	none	none	none	none
ftsh4-1 FTSH4TRAP.FLAG	Isocitrate dehydrogenase NAD regulatory subunit 1	AT4G35260.1	376	40001	8	8	5	5	19	0.74
ftsh4-1			139		2	2	2	2	9	0.17
ftsh4-1 FTSH4TRAP.FLAG			378		7	7	5	5	19	0.61
ftsh4-1			180		2	2	2	2	11	0.17
ftsh4-1 FTSH4TRAP.FLAG	succinate dehydrogenase flavoprotein subunit 5	AT1G47420.1	1246	28145	23	23	8	8	43	4.34
ftsh4-1			493		8	8	4	4	29	1.19
ftsh4-1 FTSH4TRAP.FLAG			184		8	4	6	3	15	0.56
ftsh4-1			none		none	none	none	none	none	none
ftsh4-1 FTSH4TRAP.FLAG	succinate dehydrogenase flavoprotein subunit 1	AT5G66760.1	953	70240	23	22	17	16	41	1.61
ftsh4-1			447		11	9	9	7	22	0.44
ftsh4-1 FTSH4TRAP.FLAG			194		7	7	6	5	14	0.32
ftsh4-1			135		3	3	3	3	5	0.15
ftsh4-1 FTSH4TRAP.FLAG	L-galactono-1,4-lactone dehydrogenase	AT3G47930.1	1169	68855	31	31	19	19	35	3.24
ftsh4-1			669		16	16	12	12	23	1.11
ftsh4-1 FTSH4TRAP.FLAG			353		11	11	9	9	17	0.67
ftsh4-1			108		4	4	4	4	7	0.2
ftsh4-1 FTSH4TRAP.FLAG	dihydroorotate dehydrogenase	AT5G23300.1	904	48801	16	16	13	13	28	1.66
ftsh4-1			477		9	9	7	7	17	0.8
ftsh4-1 FTSH4TRAP.FLAG			386		8	8	7	7	15	0.69
ftsh4-1			140		3	3	3	3	6	0.22
ftsh4-1 FTSH4TRAP.FLAG	mitochondrial inner membrane protease subunit 1	AT1G53530.1	172	18827	4	4	4	4	23	0.64
ftsh4-1			none		none	none	none	none	none	none
ftsh4-1 FTSH4TRAP.FLAG			100		3	3	3	3	24	0.64
ftsh4-1			none		none	none	none	none	none	none
ftsh4-1 FTSH4TRAP.FLAG	OXA1-like protein	AT2G46470.1	339	48095	9	9	8	8	22	0.82
ftsh4-1			81		3	3	3	3	8	0.22
ftsh4-1 FTSH4TRAP.FLAG			129		5	4	4	3	10	1.03
ftsh4-1			none		none	none	none	none	none	none
ftsh4-1 FTSH4TRAP.FLAG	Pam18-2	AT3G09700.1	403	12101	12	12	3	3	33	3.48
ftsh4-1			none		none	none	none	none	none	none
ftsh4-1 FTSH4TRAP.FLAG			142		4	3	3	2	23	0.65
ftsh4-1			none		none	none	none	none	none	none
ftsh4-1 FTSH4TRAP.FLAG	Sam50-2	AT5G05520.1	450	58769	14	14	13	13	28	1.15
ftsh4-1			256		4	4	4	4	10	0.24
ftsh4-1 FTSH4TRAP.FLAG			399		10	9	10	9	23	0.63
ftsh4-1			113		4	4	4	4	8	0.24
ftsh4-1 FTSH4TRAP.FLAG	Pam18-1	AT2G35795.1	539	11989	15	15	5	5	59	8.66
ftsh4-1			229		7	7	3	3	34	3.53
ftsh4-1 FTSH4TRAP.FLAG			128		4	4	3	3	25	0.66
ftsh4-1			none		none	none	none	none	none	none
ftsh4-1 FTSH4TRAP.FLAG	Tim17-2	AT2G37410.1	460	25668	7	7	5	5	32	1.36
ftsh4-1			231		4	4	3	3	21	0.63
ftsh4-1 FTSH4TRAP.FLAG			190		3	3	2	2	13	0.44
ftsh4-1			none		none	none	none	none	none	none
ftsh4-1 FTSH4TRAP.FLAG	Slp2	AT5G54100.1	4929	43694	180	180	12	12	28	1.98
ftsh4-1			none		none	none	none	none	none	none
ftsh4-1 FTSH4TRAP.FLAG			1500		39	39	18	18	48	6.68
ftsh4-1			214		6	6	6	6	16	0.55
ftsh4-1 FTSH4TRAP.FLAG	Slp1	AT4G27585.1	9621	45049	337	337	26	26	61	26.74
ftsh4-1			1030		31	31	20	20	46	0.89
ftsh4-1 FTSH4TRAP.FLAG			2245		68	65	24	23	64	15.91
ftsh4-1			85		2	2	2	2	5	0.15
ftsh4-1 FTSH4TRAP.FLAG	Mic60	AT4G39690.1	1236	70567	29	29	21	21	43	2.74
ftsh4-1			422		11	11	10	10	24	0.65
ftsh4-1 FTSH4TRAP.FLAG			1162		29	28	23	22	44	2.12
ftsh4-1			262		9	9	9	9	17	0.51
ftsh4-1 FTSH4TRAP.FLAG	Gamete cell defective (GCD)	AT5G62270.1	715	43970	25	25	15	15	40	5.12
ftsh4-1			none		none	none	none	none	none	none
ftsh4-1 FTSH4TRAP.FLAG			256		12	12	11	11	30	1.39
ftsh4-1			none		none	none	none	none	none	none
Legend:
repetition 1
repetition 2
none = not found
